# Supplementary material for: Regulation of B-Cell Receptor Signaling and Its Therapeutic Relevance in Aggressive B-Cell Lymphomas
Source: MDPI journal article supplement (doi:10.3390/cancers14040860), 2022-02-09
Supplement: s1 [file s1]

**Supplemental Table S1.** Recruiting information and preliminary results of clinical trials with targeted-BCR inhibition as single agent or combinatorial treatments

| Targets         | Drug / Regimen                       | Clinical Trial | Phase | Nb pts | Status             | Conditions                                   | Response Data                   | Reference |
|-----------------|--------------------------------------|----------------|-------|--------|--------------------|----------------------------------------------|---------------------------------|-----------|
| <b>BTK</b>      | Abivertinib                          | NCT03060850    | 1     | 184    | Unknown status     | B-cell Lymphomas                             | PR 61.5%<br>AEs Grade 3/4 47.6% | [181]     |
| <b>BTK</b>      | BGB-16673                            | NCT05006716    | 1     | 76     | Recruiting         | B-cell Lymphomas                             | NA                              | NA        |
| <b>BTK</b>      | CT-1530                              | NCT02981745    | 1 & 2 | 200    | Recruiting         | R/R nHL, R/R CLL, MCL, DLBCL                 | NA                              | NA        |
| <b>BTK</b>      | HZ-A-018                             | NCT04173455    | 1     | 46     | Recruiting         | B-Cell Lymphomas                             | NA                              | NA        |
| <b>BTK</b>      | ARQ-531                              | NCT03162536    | 1 & 2 | 190    | Recruiting         | No                                           | No drug related AEs             | [182]     |
| <b>BTK</b>      | NX-2127                              | NCT04830137    | 1     | 130    | Recruiting         | R/R B-cell Lymphomas                         | NA                              | NA        |
| <b>BTK</b>      | Orelabrutinib                        | NCT04438005    | 2     | 85     | Recruiting         | DLBCL                                        | NA                              | NA        |
| <b>BTK</b>      | Pirtobrutinib                        | NCT04662255    | 3     | 500    | Recruiting         | MCL                                          | NA                              | NA        |
| <b>BTK</b>      | Zanubrutinib                         | NCT05068440    | 2     | 66     | Not yet recruiting | R/R DLBCL                                    | NA                              | NA        |
| <b>PI3K</b>     | YY-20394                             | NCT03757000    | 1     | 42     | Unknown status     | B-cell Lymphomas                             | ORR 64%<br>PFS 255 days         | [183]     |
| <b>BTK</b>      | Acalabrutinib + CAR-T cell           | NCT04257578    | 1 & 2 | 40     | Recruiting         | DLBCL, Transformed FL                        | NA                              | NA        |
| <b>BTK</b>      | Acalabrutinib + Chemotherapy         | NCT03736616    | 2     | 47     | Recruiting         | DLBCL                                        | NA                              | [184]     |
| <b>BTK MDM2</b> | Acalabrutinib + KRT-232              | NCT04502394    | 1 & 2 | 84     | Recruiting         | DLBCL, CLL                                   | NA                              | [185]     |
| <b>BTK</b>      | Acalabrutinib + R-CHOP               | NCT04978584    | 2     | 60     | Not yet recruiting | DLBCL                                        | NA                              | NA        |
| <b>BTK</b>      | Acalabrutinib + R-CHOP               | NCT04546620    | 2     | 453    | Not yet recruiting | DLBCL                                        | NA                              | NA        |
| <b>BTK</b>      | Acalabrutinib + Immuno-chemotherapy  | NCT04002947    | 2     | 132    | Recruiting         | DLBCL                                        | NA                              | NA        |
| <b>BTK TLR9</b> | Ibrutinib + SD-101 + Radiation       | NCT02927964    | 1 & 2 | 30     | Recruiting         | FL, MZL, MCL                                 | ORR 50%                         | [186]     |
| <b>BTK</b>      | Ibrutinib + CAR-T cell               | NCT04234061    | 2     | 20     | Recruiting         | Recurrent MCL                                | NA                              | [187]     |
| <b>BTK</b>      | Ibrutinib + Chemotherapy             | NCT02443077    | 3     | 302    | Recruiting         | R/R ABC DLBCL                                | NA                              | [188]     |
| <b>BTK ROR1</b> | Ibrutinib + Cirmtuzumab              | NCT03088878    | 1 & 2 | 160    | Recruiting         | CLL, SLL, MCL                                | ORR 83%<br>CR 50%               | [189]     |
| <b>BTK</b>      | Ibrutinib + EPOCH-R                  | NCT03220022    | 1     | 54     | Recruiting         | DLBCL                                        | NA                              | NA        |
| <b>BTK CD20</b> | Ibrutinib + Obinutuzumab             | NCT03198026    | 2     | 30     | Recruiting         | B-cell Lymphomas                             | NA                              | NA        |
| <b>BTK</b>      | Ibrutinib + Pevonedistat             | NCT03479268    | 1     | 30     | Recruiting         | R/R CLL, R/R DLBCL, R/R FL, R/R MCL, R/R MZL | NA                              | NA        |
| <b>BTK CD20</b> | Ibrutinib + Rituximab + Bendamustine | NCT02747732    | 2     | 72     | Recruiting         | R/R DLBCL                                    | NA                              | NA        |

|                              |                                               |             |         |     |                       |                                        |                                    |       |
|------------------------------|-----------------------------------------------|-------------|---------|-----|-----------------------|----------------------------------------|------------------------------------|-------|
| <b>BTK<br/>MIL63</b>         | Orelabrutinib + Ab<br>MIL62                   | NCT04304040 | 1 & 2   | 120 | Recruiting            | R/R B-cell<br>Lymphomas                | ORR 70%                            | [190] |
| <b>BTK</b>                   | Pirtobrutinib +<br>Rituximab +<br>Venetoclax  | NCT03740529 | 1 & 2   | 860 | Recruiting            | CLL, WM, MCL,<br>MZL, SLL              | ORR 86%<br>AEs in less<br>than 10% | [191] |
| <b>BTK</b>                   | Zanubrutinib + R-<br>CHOP                     | NCT04835870 | 2       | 20  | Recruiting            | ABC DLBCL                              | NA                                 | NA    |
| <b>BTK<br/>CD20</b>          | Zanubrutinib +<br>Rituximab +<br>Lenalidomide | NCT04436107 | 1       | 67  | Recruiting            | R/R DLBCL                              | NA                                 | NA    |
| <b>BTK<br/>mTOR</b>          | DTRMWXHS-12 +<br>Everolimus +<br>Pomalidomide | NCT04305444 | 2       | 120 | Recruiting            | RR B-cell<br>Lymphomas                 | NA                                 | NA    |
| <b>BTK<br/>PI3K<br/>PD1</b>  | Zanubrutinib + BGB-<br>10188 + Tislelizumab   | NCT04282018 | 1 & 2   | 150 | Recruiting            | CLL, FL, MZL,<br>MCL, DLBCL            | NA                                 | NA    |
| <b>BTK<br/>PI3K</b>          | TG1701 + YY-20394                             | NCT04948788 | 1 & 2   | 102 | Recruiting            | R/R B-cell<br>Lymphomas                | NA                                 | NA    |
| <b>BTK<br/>CD20<br/>PI3K</b> | TG1701 + Ublituximab<br>+ Umbralisib          | NCT03671590 | 1       | 200 | Recruiting            | B-cell<br>Lymphomas                    | ORR 82.3%<br>CR 23.5%              | [192] |
| <b>PI3K</b>                  | Copanlisib +<br>R-EPOCH                       | NCT04933617 | 1       | 34  | Not yet<br>recruiting | BL, DLBCL,<br>GCB DLBCL                | NA                                 | NA    |
| <b>PI3K</b>                  | Copanlisib + Immuno-<br>chemotherapy          | NCT04156828 | 1       | 21  | Recruiting            | FL, DLBCL                              | NA                                 | NA    |
| <b>PI3K</b>                  | Duvelisib + CAR-T cell                        | NCT04890236 | Early 1 | 20  | Not yet<br>recruiting | R/R DLBCL                              | NA                                 | NA    |
| <b>PI3K<br/>PD1</b>          | Umbralisib +<br>Pembrolizumab                 | NCT03283137 | 1       | 36  | Recruiting            | B-cell<br>Lymphomas                    | NA                                 | NA    |
| <b>PI3K<br/>CD20</b>         | Umbralisib +<br>Ublituximab +<br>Lenalidomide | NCT04635683 | 1       | 42  | Recruiting            | R/R MZL, R/R<br>FL, R/R MCL,<br>R/R WM | NA                                 | NA    |
